# Supplementary material for: Associations between Cigarette Smoking and Total Mortality Differ Depending on Serum Concentrations of Persistent Organic Pollutants among the Elderly
Source: PubMed Central journal article supplement — J Korean Med Sci. 2013 Jul 31;28(8):1122–8. doi: 10.3346/jkms.2013.28.8.1122 (PMC3744697; doi:10.3346/jkms.2013.28.8.1122), 2013-07-31
Supplement: jkms-28-1122-s001.pdf [file jkms-28-1122-s001.pdf]

**Supplementary Table S1.** Distribution of serum concentrations by tertiles of serum concentrations of individual persistent organic pollutants (POPs)

| Analytes                                                   | Tertiles of serum concentrations of POPs |               |                  |
|------------------------------------------------------------|------------------------------------------|---------------|------------------|
|                                                            | 1st tertile                              | 2nd tertile   | 3rd tertile      |
| <b>Polychlorinated dibenzo-p-dioxins (PCDDs)</b>           |                                          |               |                  |
| 1,2,3,6,7,8-Hexachlorodibenzo-p-dioxin (pg/g of lipid)     | 1.8-47.4                                 | 47.6-78.7     | 78.9-314.0       |
| 1,2,3,4,6,7,8-Heptachlorodibenzo-p-dioxin (pg/g of lipid)  | 3.0-44.4                                 | 44.5-81.2     | 81.4-760.0       |
| 1,2,3,4,6,7,8,9-Octachlorodibenzo-p-dioxin (pg/g of lipid) | 58.5-351.0                               | 352.0-714.0   | 719.0-8,190.0    |
| <b>Polychlorinated dibenzofurans (PCDFs)</b>               |                                          |               |                  |
| 2,3,4,7,8-Pentachlorodibenzofuran (pg/g of lipid)          | 0.8-8.0                                  | 8.1-13.2      | 13.3-39.7        |
| 1,2,3,4,7,8-Hexachlorodibenzofuran (pg/g of lipid)         | 1.0-5.6                                  | 5.7-9.3       | 9.4-44.4         |
| 1,2,3,4,6,7,8-Heptachlorodibenzofuran (pg/g of lipid)      | 1.0-6.1                                  | 6.2-10.4      | 10.5-114.0       |
| <b>Polychlorinated biphenyls (PCBs)</b>                    |                                          |               |                  |
| PCB074 (ng/g of lipid)                                     | 1.2-14.0                                 | 14.0-26.3     | 26.4-167.0       |
| PCB099 (ng/g of lipid)                                     | 0.7-7.1                                  | 7.1-15.9      | 16.0-146.0       |
| PCB118 (ng/g of lipid)                                     | 0.9-14.7                                 | 14.7-32.1     | 32.2-361.0       |
| PCB126 (pg/g of lipid)                                     | 1.8-28.6                                 | 28.9-62.3     | 62.6-726.0       |
| PCB146 (ng/g of lipid)                                     | 0.1-6.2                                  | 6.3-10.8      | 10.9-116.0       |
| PCB153 (ng/g of lipid)                                     | 1.9-56.4                                 | 56.7-93.6     | 93.9-986.0       |
| PCB156 (ng/g of lipid)                                     | 0.9-8.8                                  | 8.8-14.1      | 14.1-367.0       |
| PCB169 (pg/g of lipid)                                     | 3.0-28.0                                 | 28.2-45.5     | 45.6-196.0       |
| PCB170 (ng/g of lipid)                                     | 2.6-17.7                                 | 17.8-28.1     | 28.2-299.0       |
| PCB180 (ng/g of lipid)                                     | 4.9-48.5                                 | 48.8-74.2     | 74.3-627.0       |
| PCB187 (ng/g of lipid)                                     | 1.8-13.0                                 | 13.1-22.0     | 22.1-158.0       |
| <b>Organochlorines pesticides (OCPs)</b>                   |                                          |               |                  |
| p,p'-DDE (ng/g of lipid)                                   | 1.6-565.0                                | 566.0-1,390.0 | 1,400.0-24,200.0 |
| Trans-nonachlor (ng/g of lipid)                            | 1.6-37.9                                 | 38.3-65.3     | 65.5-584.0       |
| Oxychlorane (ng/g of lipid)                                | 1.3-26.2                                 | 26.3-41.9     | 42.2-289.0       |
| Heptachlor epoxide (ng/g of lipid)                         | 1.3-6.9                                  | 7.0-12.9      | 13.0-201.0       |
| β-hexachlorocyclohexane (ng/g of lipid)                    | 1.6-20.5                                 | 20.6-43.7     | 44.0-3,500.0     |
